# Supplementary material for: Network of protein interactions within the Drosophila inner kinetochore
Source: PubMed Central journal article supplement (PMC4772809; doi:10.1098/rsob.150238), 2016-02-24
Supplement: rsob150238supp1.pdf [file rsob150238supp1.pdf]

## **Electronic Supplementary Materials**

### **Supplementary Figure S1. Modelling of the coiled-coil based interaction between Mis12 and Nnf1a.**

3600 alternative structural alignments of Mis12 and Nnf1a proteins on the reference coiled-coil structure, scored according to the number of intermolecular Leu-Leu contacts. All structures with more than 8 contacts are denoted by circles. The best alignments (difference in register shifts by 14 aa), represented by solid line, identify five highly-scored structures (3 with 13 and 2 with 12 Leu-Leu contacts, respectively), all of which are almost equivalent due to (i,i+7) pseudo-translational symmetry of a coiled-coil, known as heptad repeat [51]. The alternative set of alignments (dotted line, relative shift between registers either 10 or 11aa) identify next four slightly less-scored structures (2 with 12 and 2 with 11 contacts), however, according to Mann's-Whitney U-test, this subsets is scored lower at  $p = 0.05$ .

### **Supplementary Figure S2. Circular dichroism measurements show that Nnf1a<sup>122-147</sup> and Mis12<sup>101-130</sup> fragments have $\alpha$ -helical structure and interact with each other.**

Concentration dependence of the circular dichroism spectra of a mixture of Mis12 peptide T<sub>101</sub>SEE..HLK<sub>130</sub> and Nnf1 peptide R<sub>122</sub>FLD...AMA<sub>147</sub>. Mean residue ellipticity (MRE) values show a double minimum at 208 and 222 nm, characteristic for  $\alpha$ -helical structure. Signal becomes stronger with peptide concentration increasing from 13 mM to 100 mM, indicating increased helix content at higher concentration. Concentration dependence implies the presence of intermolecular interactions stabilizing the Mis12-Nnf1 peptide complex. Inset shows the concentration dependence of MRE values at 222 nm for the complex (red) and separate preparation of Mis12 peptide (blue) and Nnf1 (green), indicating the presence of non-

covalent complexes in all three cases in the form of Mis12-Mis12 and Nnf1-Nnf1 dimers and Mis12-Nnf1 dimers and tetramers.

**Supplementary Figure S3. NMR of Mis12<sup>101-130</sup> and Nnf1a<sup>122-147</sup>.**

The representative high-field region of 2D[1H-1H]-TOCSY spectra recorded for Mis12 (left) and Nnf1a (right), overlaid with that of equimolar mixture of Mis12 and Nnf1a proteins (green). Signals of V128 and I144 of Nnf1a are assigned unequivocally, while these of Leu residues are only assigned to a separate spin systems (L1-L4). Location of most of resonances, with the exception of a single Leu residue of Nnf1a (L2), visibly varies upon mixing of both protein samples, thus identifying regions involved in the intermolecular interaction.

**Supplementary Figure S4. Neither Nnf1a nor Mis12 interacts with CENP-C<sup>1-94</sup> or Nsl1 on its own.**

A. Schematic representation of Y2H experiments used for an analysis of pairwise protein-protein interactions of Mis12 complex subunits (Mis12, Nsl1, Nnf1a) and the amino-terminal region of CENP-C (CENP-C<sup>1-188</sup>). Red arrows indicate positive interactions. Grey arrows with crosses indicate interactions that were tested and gave negative results. Lines with double arrowheads indicate that the interaction was performed in both configurations, meaning each protein was tested in fusion to the transcription activation domain (AD), while the partner was fused to DNA-binding domain (BD), and in the reciprocal fusion protein configuration. As Nsl1 fused to the DNA-binding domain of GAL4 auto-activated the transcription from the promoter, it was not included in the assay. Therefore the interactions with Nsl1 were performed only in a configuration where Nsl1 was fused to AD (indicated by single headed arrows).

B. Western Blots showing results of co-expressions and co-purifications of Mis12 Complex subunits (Mis12, Nsl1, Nnf1a) and the amino-terminal region of CENP-C (CENP-C<sup>1-94</sup>) in

*E.coli*. Mis12 co-purified with 6xHis::Nnfla provides positive control. All proteins were expressed as indicated by specific bands in unbound fraction.

**Supplementary Figure S5. Size Exclusion Chromatography - Multiple Angle Light Scattering (SEC-MALS) mass measurements of recombinant complexes.**

Chromatograms show elution profiles measured in UV<sub>280</sub> and UV<sub>254</sub>, Light Scattering (LS) signals and calculated molecular weight (MW). X axis shows elution volume in ml. AU – Arbitrary Unit.

**Supplementary Figure S6. SEC-MALS mass measurements of recombinant dimerised complexes**

A – C. Chromatograms show elution profiles for 3 reconstituted protein complexes measured in UV<sub>280</sub> and UV<sub>254</sub>, Light Scattering (LS) signals and calculated molecular weight (MW). X axis shows elution volume in ml. AU – Arbitrary Unit.

D. Table showing theoretical masses of monomeric and dimeric complexes and masses calculated by Multiple Angle Light Scattering (MALS)

**Supplementary Figure 7. Testing the specificity of antibody raised against CENP-C<sup>1-188</sup>**

Western Blot analysis showing specificity of anti-CENP-C<sup>1-188</sup> antibody after gene specific RNAi in *D.mel-2* cells.

| Bait                                         | Proteins pulled down with bait |         |               |         |               |         |               |         |
|----------------------------------------------|--------------------------------|---------|---------------|---------|---------------|---------|---------------|---------|
|                                              | CENP-C                         |         | Nnfla         |         | Mis12         |         | Nsl1          |         |
|                                              | Protein score                  | Matches | Protein score | Matches | Protein score | Matches | Protein score | Matches |
| PtA::CENP-C 1-188 aa                         | 4696                           | 93      | 69            | 2       | 423           | 8       | 267           | 4       |
| PtA::CENP-C 1-94 aa                          | 5860                           | 90      | 243           | 4       | -             | -       | 151           | 2       |
| GFP::CENP-C                                  | 28139                          | 468     | 1045          | 24      | 2715          | 44      | 50            | 1       |
| GFP::CENP-C F26A, F29A                       | 66390                          | 1049    | -             | -       | -             | -       | -             | -       |
| GFP::CENP-C 1-94: F26A, F29A                 | 13122                          | 170     | -             | -       | -             | -       | -             | -       |
| GFP::CENP-C 1-94: L12A, L16A                 | 17934                          | 300     | 1812          | 25      | 852           | 19      | 499           | 6       |
| GFP::Nsl1                                    | -                              | -       | 1871          | 31      | 5959          | 145     | 16153         | 254     |
| Nsl1 1-101 aa::GFP                           | -                              | -       | -             | -       | -             | -       | 17580         | 233     |
| GFP::Nsl1 102-157aa                          | 16                             | 785     | 2394          | 38      | 8063          | 130     | 10404         | 163     |
| Nsl1 102-157aa::GFP                          | 5                              | 258     | 1046          | 23      | 2211          | 42      | 6765          | 108     |
| GFP::Nsl1 158-183aa                          | -                              | -       | -             | -       | -             | -       | 3333          | 39      |
| GFP::Nsl1 102-183aa                          | 5                              | 185     | 1273          | 32      | 4660          | 83      | 6845          | 95      |
| GFP::Nsl1 102-170aa                          | 1510                           | 23      | 728           | 17      | 3041          | 54      | 5751          | 104     |
| GFP::Nsl1 F138A,T139A,N140A (purification 1) | -                              | -       | -             | -       | 79            | 2       | 16689         | 185     |
| GFP::Nsl1 F138A,T139A,N140A (purification 2) | -                              | -       | 133           | 3       | 589           | 15      | 8299          | 157     |
| GFP::Nsl1 F138A,T139A,N140A (purification 3) | -                              | -       | 58            | 2       | 104           | 3       | 4984          | 70      |
| GFP::Nnfla                                   | 541                            | 11      | 19164         | 390     | 1365          | 37      | 1386          | 19      |
| GFP::Nnfla 122-194 aa                        | -                              | -       | 53164         | 776     | 1106          | 24      | 172           | 2       |
| GFP::Nnfla 1-150 aa                          | 1203                           | 20      | 33338         | 457     | 2959          | 70      | -             | -       |
| GFP::Nnfla L142D                             | -                              | -       | 16554         | 341     | -             | -       | -             | -       |

|                                       |      |    |       |     |       |     |      |    |
|---------------------------------------|------|----|-------|-----|-------|-----|------|----|
| GFP:: Nnf1a W41A, I44A, Y45A          | -    | -  | 30758 | 517 | 1976  | 44  | 723  | 12 |
| GFP::Mis12                            | 1313 | 28 | 5335  | 87  | 39708 | 941 | 4380 | 71 |
| GFP::Mis12 103-181 aa                 | -    | -  | 862   | 18  | 25809 | 790 | 344  | 5  |
| GFP::Mis12 1-132 aa                   | 433  | 8  | 570   | 16  | 43650 | 948 | -    | -  |
| GFP::Mis12 1-89 aa                    | -    | -  | -     | -   | 9357  | 112 | -    | -  |
| GFP::Mis12 90-181 aa                  | -    | -  | 968   | 18  | 11854 | 225 | 1492 | 17 |
| GFP::Mis12 L112D, L115D, L126D, L129D | -    | -  | -     | -   | 24299 | 421 | -    | -  |
| GFP::Mis12 L126D, L129D               | -    | -  | -     | -   | 20720 | 354 | -    | -  |
| GFP::Mis12 L112D, L115D               | -    | -  | -     | -   | 26491 | 428 |      |    |
| GFP::Mis12 F12A, F13A, F15A, T16A     | -    | -  | 1938  | 37  | 46887 | 908 | 2292 | 33 |

### Supplementary Table S1.

List of selected proteins identified in AP-MS experiments. Protein Score is a number that reflects the combined scores of all observed mass spectra that can be matched to amino acid sequences within that protein. Matches reflect number of peptides identified for each protein by Mascot software (Matrix Science). (-) - no matches corresponding to particular protein were identified in the search.

| #  | AD                         | BD                         | Selection     | Interaction |
|----|----------------------------|----------------------------|---------------|-------------|
| 1  | CENP-C <sup>1-188 aa</sup> | Mis12                      | SD-LW + XαGal | No          |
| 2  | CENP-C <sup>1-188 aa</sup> | Nnf1a                      | SD-LW + XαGal | No          |
| 3  | CENP-C <sup>1-188 aa</sup> | CENP-C <sup>1-188 aa</sup> | SD-LW + XαGal | No          |
| 4  | CENP-C <sup>1-188 aa</sup> | Empty                      | SD-LW + XαGal | No          |
| 5  | Empty                      | CENP-C <sup>1-188 aa</sup> | SD-LW + XαGal | No          |
| 6  | Empty                      | CENP-C <sup>1-788 aa</sup> | SD-LW + Aba   | No          |
| 7  | Mis12                      | CENP-C <sup>1-788 aa</sup> | SD-LW + XαGal | No          |
| 8  | Nnf1a                      | CENP-C <sup>1-788 aa</sup> | SD-LW + XαGal | No          |
| 9  | Nsl1                       | CENP-C <sup>1-788 aa</sup> | SD-LW + XαGal | No          |
| 10 | Empty                      | CENP-C <sup>1-788 aa</sup> | SD-LW + XαGal | No          |
| 11 | Nnf1a                      | Mis12                      | SD-LW + XαGal | Yes         |
| 12 | Nnf1a                      | Nnf1a                      | SD-LW + XαGal | No          |
| 13 | Nnf1a                      | CENP-C <sup>1-188 aa</sup> | SD-LW + XαGal | No          |
| 14 | Nnf1a                      | Empty                      | SD-LW + XαGal | No          |
| 15 | Nnf1a                      | Empty                      | SD-LW + Aba   | No          |
| 16 | Nnf1a                      | Mis12 L112D                | SD-LW + Aba   | No          |
| 17 | Nnf1a                      | Mis12 L115D                | SD-LW + Aba   | No          |
| 18 | Nnf1a                      | Mis12 L126D, L129D         | SD-LW + Aba   | No          |
| 19 | Nnf1a                      | Mis12 L126D                | SD-LW + Aba   | No          |
| 20 | Nnf1a                      | Mis12 L129D                | SD-LW + Aba   | No          |
| 21 | Empty                      | Nnf1a                      | SD-LW + XαGal | No          |
| 22 | Empty                      | Nnf1a L142D                | SD-LW + Aba   | No          |
| 23 | Mis12                      | Nnf1a                      | SD-LW + XαGal | Yes         |
| 24 | Mis12                      | Mis12                      | SD-LW + XαGal | No          |
| 25 | Mis12                      | CENP-C <sup>1-188 aa</sup> | SD-LW + XαGal | No          |
| 26 | Mis12                      | Empty                      | SD-LW + XαGal | No          |
| 27 | Mis12                      | Empty                      | SD-LW + Aba   | No          |

|    |       |                            |                        |     |
|----|-------|----------------------------|------------------------|-----|
| 28 | Mis12 | Nnfla L142D                | SD-LW + Aba            | No  |
| 29 | Empty | Mis12                      | SD-LW + X $\alpha$ Gal | No  |
| 30 | Empty | Mis12 L112D                | SD-LW + Aba            | No  |
| 31 | Empty | Mis12 L115D                | SD-LW + Aba            | No  |
| 32 | Empty | Mis12 L126D, L129D         | SD-LW + Aba            | No  |
| 33 | Empty | Mis12 L126D                | SD-LW + Aba            | No  |
| 34 | Empty | Mis12 L129D                | SD-LW + Aba            | No  |
| 35 | Nsl1  | Empty                      | SD-LW + X $\alpha$ Gal | No  |
| 36 | Nsl1  | Empty                      | SD-LW + Aba            | No  |
| 37 | Empty | Nsl1                       | SD-LW + X $\alpha$ Gal | Yes |
| 38 | Nsl1  | Nsl1                       | SD-LW + X $\alpha$ Gal | Yes |
| 39 | Nsl1  | Mis12                      | SD-LW + X $\alpha$ Gal | No  |
| 40 | Nsl1  | Nnfla                      | SD-LW + X $\alpha$ Gal | No  |
| 41 | Nsl1  | CENP-C <sup>1-188 aa</sup> | SD-LW + X $\alpha$ Gal | No  |
| 42 | Nsl1  | CENP-C <sup>1-788 aa</sup> | SD-LW + Aba            | No  |

### Supplementary Table S2.

List of performed Yeast-2-Hybrid experiments. Note that Nsl1 fused to the DNA-binding domain of GAL4 (BD) auto-activated the transcription from the promoter therefore it was not included in further assays. Interactions with Nsl1 were performed only in a configuration where Nsl1 was fused to the transcription activation domain (AD). SD-LW+Aba – selection plate without leucine and tryptophan supplemented with AureobasidinA. SD-LW+ X $\alpha$ Gal - selection plate without leucine and tryptophan supplemented with X $\alpha$ Gal.

## Yeast 2 Hybrid vectors

| #  | Vector  | cDNA                         | Enzymes used for cloning | Fusion             | Selectable marker (for propagation in yeast) | Selectable marker (for propagation in <i>E.coli</i> ) | Forward primer (used for cloning)          | Reverse primer (used for cloning)               | Mutagenesis primer - forward                                                            | Mutagenesis primer - reverse                                                         |
|----|---------|------------------------------|--------------------------|--------------------|----------------------------------------------|-------------------------------------------------------|--------------------------------------------|-------------------------------------------------|-----------------------------------------------------------------------------------------|--------------------------------------------------------------------------------------|
| 1  | pGBT9   | CenpC <sup>1-188</sup>       | EcoR1, BamH1             | N terminal Gal4 BD | TRP1                                         | Amp <sup>R</sup>                                      | 5'GTGACAGAATTCATGTGCA<br>ACCCCAGAACAAAC3'  | 5'ATACGCGGATCCTCATTAGGCA<br>ACTTCCTCTTTTGT3'    | ----                                                                                    | ----                                                                                 |
| 2  | pGBT9   | Mis12                        | EcoR1, Sal1              | N terminal Gal4 BD | TRP1                                         | Amp <sup>R</sup>                                      | 5'GTGACAGAATTCATGGACT<br>TCAATAGCCTAGCC3'  | 5'ATACGCGTCGACTCATTAAATCA<br>GTCTCCTCTTTATGTC3' | ----                                                                                    | ----                                                                                 |
| 3  | pGBT9   | Nnf1a                        | Sal1, Sma1               | N terminal Gal4 BD | TRP1                                         | Amp <sup>R</sup>                                      | 5'GTGACACCCGGGTATGGAG<br>GATTGCGAAGCC3'    | 5'ATACGCGTCGACTCATTAGAAG<br>TCGTTCAATGCTTCGCC3' | ----                                                                                    | ----                                                                                 |
| 4  | pGBT9   | Nsl1                         | EcoR1, Sal1              | N terminal Gal4 BD | TRP1                                         | Amp <sup>R</sup>                                      | 5'GTGACAGAATTCATGGAGC<br>CAGCCGAAAAGTCCA3' | 5'ATACGCGTCGACTCATTACCGT<br>TGGTTGCCATATTCTG3'  | ----                                                                                    | ----                                                                                 |
| 5  | pGAD424 | CenpC <sup>1-188</sup>       | EcoR1, BamH1             | N terminal Gal4 AD | LEU2                                         | Amp <sup>R</sup>                                      | 5'GTGACAGAATTCATGTGCA<br>ACCCCAGAACAAAC3'  | 5'ATACGCGGATCCTCATTAGGCA<br>ACTTCCTCTTTTGT3'    | ----                                                                                    | ----                                                                                 |
| 6  | pGAD424 | Mis12                        | EcoR1, Sal1              | N terminal Gal4 AD | LEU2                                         | Amp <sup>R</sup>                                      | 5'GTGACAGAATTCATGGACT<br>TCAATAGCCTAGCC3'  | 5'ATACGCGTCGACTCATTAAATCA<br>GTCTCCTCTTTATGTC3' | ----                                                                                    | ----                                                                                 |
| 7  | pGAD424 | Nnf1a                        | Sal1, Sma1               | N terminal Gal4 AD | LEU2                                         | Amp <sup>R</sup>                                      | 5'GTGACACCCGGGTATGGAG<br>GATTGCGAAGCC3'    | 5'ATACGCGTCGACTCATTAGAAG<br>TCGTTCAATGCTTCGCC3' | ----                                                                                    | ----                                                                                 |
| 8  | pGAD424 | Nsl1                         | EcoR1, Sal1              | N terminal Gal4 AD | LEU2                                         | Amp <sup>R</sup>                                      | 5'GTGACAGAATTCATGGAGC<br>CAGCCGAAAAGTCCA3' | 5'ATACGCGTCGACTCATTACCGT<br>TGGTTGCCATATTCTG3'  | ----                                                                                    | ----                                                                                 |
| 9  | pGBKT7  | CenpC <sup>1-788 aa</sup>    | Nde1, BamH1              | N terminal Gal4 BD | TRP1                                         | Kan <sup>R</sup>                                      | 5'AGGAGGACCTGCATATGAT<br>GGTCGAAGCC3'      | 5'TAGGATCCCTACAGTTGTTCT<br>CCATCGCC3'           | ----                                                                                    | ----                                                                                 |
| 10 | pGBT9   | CenpC <sup>1-788 aa</sup>    | EcoR1, BamH1             | N terminal Gal4 BD | TRP1                                         | Amp <sup>R</sup>                                      | 5'GTGACAGAATTCATGTGCA<br>AGCCCCAGAACAAAC3' | 5'ATACGCGGATCCTCATTACAGT<br>TCGTTCTCCATCGCC3'   | ----                                                                                    | ----                                                                                 |
| 11 | pGBT9   | Mis12 <sup>L112D</sup>       | EcoR1, Sal1              | N terminal Gal4 BD | TRP1                                         | Amp <sup>R</sup>                                      | 5'GTGACAGAATTCATGGACT<br>TCAATAGCCTAGCC3'  | 5'ATACGCGTCGACTCATTAAATCA<br>GTCTCCTCTTTATGTC3' | 5'AGAGGAGGAGCAGAAGACA<br>GCCAGGGACGAGGAGCTGAA<br>GGCCAAATACAGAGAGAACAT<br>GG3'          | 5'CCATGTTCTCTGTATTT<br>GGCCTCAGCTCCTCGTCCC<br>TGGCTGTCTTCTGCTCCTCT<br>CT3'           |
| 12 | pGBT9   | Mis12 <sup>L115D</sup>       | EcoR1, Sal1              | N terminal Gal4 BD | TRP1                                         | Amp <sup>R</sup>                                      | 5'GTGACAGAATTCATGGACT<br>TCAATAGCCTAGCC3'  | 5'ATACGCGTCGACTCATTAAATCA<br>GTCTCCTCTTTATGTC3' | 5'AGAGGAGGAGCAGAAGACA<br>GCCAGGTTGGAGGAGGACAA<br>GGCCAAATACAGAGAGAACAT<br>GG3'          | 5'CCATGTTCTCTGTATTT<br>GGCCTGTCTCCTCAACCT<br>GGCTGTCTTCTGCTCCTCTC<br>T3'             |
| 13 | pGBT9   | Mis12 <sup>L126D,L129D</sup> | EcoR1, Sal1              | N terminal Gal4 BD | TRP1                                         | Amp <sup>R</sup>                                      | 5'GTGACAGAATTCATGGACT<br>TCAATAGCCTAGCC3'  | 5'ATACGCGTCGACTCATTAAATCA<br>GTCTCCTCTTTATGTC3' | 5'CAAATACAGAGAGAACATG<br>GCCATGGACGCGCATGACAAG<br>ATCGAGGAGGAGAAGTACGC<br>CG3'          | 5'CGGCGTACTTCTCCTCCTC<br>GATCTTGTATGCGCGTCCA<br>TGGCCATGTTCTCTCTGTATT<br>TG3'        |
| 14 | pGBT9   | Mis12 <sup>L126D</sup>       | EcoR1, Sal1              | N terminal Gal4 BD | TRP1                                         | Amp <sup>R</sup>                                      | 5'GTGACAGAATTCATGGACT<br>TCAATAGCCTAGCC3'  | 5'ATACGCGTCGACTCATTAAATCA<br>GTCTCCTCTTTATGTC3' | 5'CAAATACAGAGAGAACATG<br>GCCATGGACGCGCATTTGAAG<br>ATCGAGGAGGAGAAGTACGC<br>CG3'          | 5'CGGCGTACTTCTCCTCCTC<br>GATCTTCAAATGCGCGTCCA<br>TGGCCATGTTCTCTCTGTATT<br>TG3'       |
| 15 | pGBT9   | Mis12 <sup>L129D</sup>       | EcoR1, Sal1              | N terminal Gal4 BD | TRP1                                         | Amp <sup>R</sup>                                      | 5'GTGACAGAATTCATGGACT<br>TCAATAGCCTAGCC3'  | 5'ATACGCGTCGACTCATTAAATCA<br>GTCTCCTCTTTATGTC3' | 5'CAAATACAGAGAGAACATG<br>GCCATGCTGGCGCATGACAAG<br>ATCGAGGAGGAGAAGTACGC<br>CG3'          | 5'CGGCGTACTTCTCCTCCTC<br>GATCTTGTATGCGCGTCCA<br>TGGCCATGTTCTCTCTGTATT<br>TG3'        |
| 16 | pGBT9   | Nnf1a <sup>L142D</sup>       | Sal1, Sma1               | N terminal Gal4 BD | TRP1                                         | Amp <sup>R</sup>                                      | 5'GTGACACCCGGGTATGGAG<br>GATTGCGAAGCC3'    | 5'ATACGCGTCGACTCATTAGAAG<br>TCGTTCAATGCTTCGCC3' | 5'CAGCGTGAATTCATGGAG<br>CAGCAACTGGCCTTCAGGCA<br>AAAGAAGATGAGATTGCTATG<br>GCCAAGAGCAAT3' | 5'ATTGCTCTTGGCCATAGCA<br>ATCTCATCTCTTTGCTGA<br>GAGGCCAGTTGCTCCTCAT<br>GAATCCACGCTG3' |



### Gateway expression vectors

| #  | Vector       | cDNA                             | Fusion               | Selectable marker<br>(for propagation in <i>E.coli</i> ) | Forward primer<br>(used for generation<br>of entry clone)            | Reverse primer<br>(used for generation of<br>entry clone)            | Mutagenesis primer -<br>forward                                                 | Mutagenesis primer<br>- reverse                                              |
|----|--------------|----------------------------------|----------------------|----------------------------------------------------------|----------------------------------------------------------------------|----------------------------------------------------------------------|---------------------------------------------------------------------------------|------------------------------------------------------------------------------|
| 1  | pMT-GFP      | CenpC                            | N terminal eGFP      | Amp <sup>R</sup>                                         | 5'GGGGACAAGTTTGTACAAA<br>AAAGCAGGCTTAATGTCGAA<br>GCCCCAGAACAACGACA3' | 5'GGGGACCACTTTGTACAAGAA<br>AGCTGGGTACTAACTGCGTATAC<br>ACATCAGCACAA3' | ----                                                                            | ----                                                                         |
| 2  | pMT-GFP      | CenpC F26A, F29A                 | N terminal eGFP      | Amp <sup>R</sup>                                         | 5'GGGGACAAGTTTGTACAAA<br>AAAGCAGGCTTAATGTCGAA<br>GCCCCAGAACAACGACA3' | 5'GGGGACCACTTTGTACAAGAA<br>AGCTGGGTACTAACTGCGTATAC<br>ACATCAGCACAA3' | 5'CCAGCCAGTGAAGGACAAG<br>GAGCGCGCCGCGCCGCCATG<br>ATGCGCAAGCTTGCCGAAAAT<br>A3'   | 5'TATTTTCGGCAAGCTTGCG<br>CATCATGGCGGCGGCGGCG<br>CGCTCCTTGCTTCACTGGC<br>TGG3' |
| 3  | pMT-GFP      | CenpC <sup>1-94</sup> F26A, F29A | N terminal eGFP      | Amp <sup>R</sup>                                         | 5'GGGGACAAGTTTGTACAAA<br>AAAGCAGGCTTAATGTCGAA<br>GCCCCAGAACAACGACA3' | 5'GGGGACCACTTTGTACAAGAA<br>AGCTGGGTACTAATTGACTTTCTC<br>GGTGGCGGC3'   | 5'CCAGCCAGTGAAGGACAAG<br>GAGCGCGCCGCGCCGCCATG<br>ATGCGCAAGCTTGCCGAAAAT<br>A3'   | 5'TATTTTCGGCAAGCTTGCG<br>CATCATGGCGGCGGCGGCG<br>CGCTCCTTGCTTCACTGGC<br>TGG3' |
| 4  | pMT-GFP      | CenpC <sup>1-94</sup> L12A, L16A | N terminal eGFP      | Amp <sup>R</sup>                                         | 5'GGGGACAAGTTTGTACAAA<br>AAAGCAGGCTTAATGTCGAA<br>GCCCCAGAACAACGACA3' | 5'GGGGACCACTTTGTACAAGAA<br>AGCTGGGTACTAATTGACTTTCTC<br>GGTGGCGGC3'   | 5'GCCCCAGAACAACGACACTC<br>TGGAGGCGCAGCATCGCCA<br>GCCAGCCAGTGAAGGACAAG<br>GAGC3' | 5'GCTCCTTGCTTCACTGG<br>CTGGTGGCGATGTCGTCG<br>GCCTCAGAGTGTGTTGTT<br>CTGGGGC3' |
| 5  | pMT-DESTNPta | CenpC <sup>1-188</sup>           | N terminal Protein A | Amp <sup>R</sup>                                         | 5'GGGGACAAGTTTGTACAAA<br>AAAGCAGGCTTAATGTCGAA<br>GCCCCAGAACAACG3'    | 5'GGGGACCACTTTGTACAAGAA<br>AGCTGGGTACTAGGCAACTTCTC<br>CTTTTTGT3'     | ----                                                                            | ----                                                                         |
| 6  | pMT-DESTNPta | CenpC <sup>1-94</sup>            | N terminal Protein A | Amp <sup>R</sup>                                         | 5'GGGGACAAGTTTGTACAAA<br>AAAGCAGGCTTAATGTCGAA<br>GCCCCAGAACAACGACA3' | 5'GGGGACCACTTTGTACAAGAA<br>AGCTGGGTACTAATTGACTTTCTC<br>GGTGGCGGC3'   | ----                                                                            | ----                                                                         |
| 7  | pMT-GFP      | Nsl1                             | N terminal eGFP      | Amp <sup>R</sup>                                         | 5'GGGGACAAGTTTGTACAAA<br>AAAGCAGGCTTAATGGAGCC<br>AGCCGAAAGTCCAGAAA3' | 5'GGGGACCACTTTGTACAAGAA<br>AGCTGGGTATCACCGTTGGTGG<br>CCATATTCTGG3'   | ----                                                                            | ----                                                                         |
| 8  | pMT-GFP      | Nsl1 <sup>1-101</sup>            | C terminal eGFP      | Amp <sup>R</sup>                                         | 5'GGGGACAAGTTTGTACAAA<br>AAAGCAGGCTTAATGGAGCC<br>AGCCGAAAGTCCAGAAA3' | 5'GGGGACCACTTTGTACAAGAA<br>AGCTGGGTACGCATGCATTACAA<br>AGTCGAAGAAC3'  | ----                                                                            | ----                                                                         |
| 9  | pMT-GFP      | Nsl1 <sup>102-183</sup>          | N terminal eGFP      | Amp <sup>R</sup>                                         | 5'GGGGACAAGTTTGTACAAA<br>AAAGCAGGCTTAGCACTGGA<br>CACGGACAATCGCAAGG3' | 5'GGGGACCACTTTGTACAAGAA<br>AGCTGGGTATTATCACCGTTGGT<br>TGGCCATATTC3'  | ----                                                                            | ----                                                                         |
| 10 | pMT-GFP      | Nsl1 <sup>102-157</sup>          | C terminal eGFP      | Amp <sup>R</sup>                                         | 5'GGGGACAAGTTTGTACAAA<br>AAAGCAGGCTTAATGGCACT<br>GGACACGGACAATCGCA3' | 5'GGGGACCACTTTGTACAAGAA<br>AGCTGGGTAGCACTGCAGCTCCA<br>TCATGTCCTCG3'  | ----                                                                            | ----                                                                         |
| 11 | pMT-GFP      | Nsl1 <sup>102-157</sup>          | N terminal eGFP      | Amp <sup>R</sup>                                         | 5'GGGGACAAGTTTGTACAAA<br>AAAGCAGGCTTAGCACTGGA<br>CACGGACAATCGCAAGG3' | 5'GGGGACCACTTTGTACAAGAA<br>AGCTGGGTATTAGCACTGCAGCT<br>CCATCATGTCC3'  | ----                                                                            | ----                                                                         |

|    |         |                                             |                 |                  |                                                                       |                                                                        |                                                                                                 |                                                                                            |
|----|---------|---------------------------------------------|-----------------|------------------|-----------------------------------------------------------------------|------------------------------------------------------------------------|-------------------------------------------------------------------------------------------------|--------------------------------------------------------------------------------------------|
| 12 | pMT-GFP | Nsl1 <sup>158-183</sup>                     | N terminal eGFP | Amp <sup>R</sup> | 5'GGGGACAAGTTTGTACAAA<br>AAAGCAGGCTTAAATATGGA<br>CGATCACTACCTATTCA3'  | 5'GGGGACCACTTTGTACAAGAA<br>AGCTGGGTATTATCACCGTTGGT<br>TGGCCATATTCA3'   | ----                                                                                            | ----                                                                                       |
| 13 | pMT-GFP | Nsl1 <sup>158-170</sup>                     | N terminal eGFP | Amp <sup>R</sup> | 5'GGGGACAAGTTTGTACAAA<br>AAAGCAGGCTTAAATATGGA<br>CGATCACTACCTATTCA3'  | 5'GGGGACCACTTTGTACAAGAA<br>AGCTGGGTATTATCATGGTGTCC<br>GCATGAATAGGTAG3' | ----                                                                                            | ----                                                                                       |
| 14 | pMT-GFP | Nsl1 L136A                                  | N terminal eGFP | Amp <sup>R</sup> | 5'GGGGACAAGTTTGTACAAA<br>AAAGCAGGCTTAAATGGAGCC<br>AGCCGAAAGTCCAGAAA3' | 5'GGGGACCACTTTGTACAAGAA<br>AGCTGGGTATCACCGTTGGTTGG<br>CCATATTCTGG3'    | 5'TTTGCAAAAACCTCGTGCAGAA<br>GCTCGCGGCTTTCACAAAACG<br>CGCCATCCGAT3'                              | 5'ATCGGATGGCCGCTTTG<br>TGAAAGCCGCCGAGCTTCG<br>ACGAAGTTTTGCAA3'                             |
| 15 | pMT-GFP | Nsl1 <sup>F138A, T139A, N140A</sup>         | N terminal eGFP | Amp <sup>R</sup> | 5'GGGGACAAGTTTGTACAAA<br>AAAGCAGGCTTAAATGGAGCC<br>AGCCGAAAGTCCAGAAA3' | 5'GGGGACCACTTTGTACAAGAA<br>AGCTGGGTATCACCGTTGGTTGG<br>CCATATTCTGG3'    | 5'AAAACCTCGTGCAGAGCTCG<br>TTGGCTGCCGCCGCCGCGGCC<br>ATCCGATTCAGGCGGAGC3'                         | 5'GCTCCGCTGAAATCGGA<br>TGCCCGCGCGCGGCGCAGC<br>CAACGAGCTTCGACGAAGT<br>TTT3'                 |
| 16 | pMT-GFP | Nnf1a                                       | N terminal eGFP | Amp <sup>R</sup> | 5'GGGGACAAGTTTGTACAAA<br>AAAGCAGGCTTAAATGGAGGA<br>TTCGGAAGCCGCATTTA3' | 5'GGGGACCACTTTGTACAAGAA<br>AGCTGGGTATCAGAAGTCGTTCA<br>ATGCTTCGCCT3'    | ----                                                                                            | ----                                                                                       |
| 17 | pMT-GFP | Nnf1a <sup>122-194</sup>                    | N terminal eGFP | Amp <sup>R</sup> | 5'GGGGACAAGTTTGTACAAA<br>AAAGCAGGCTTACGATTTTTG<br>GACTTCAGCGTGAAT3'   | 5'GGGGACCACTTTGTACAAGAA<br>AGCTGGGTATTATCAGAAGTCGT<br>TCAATGCTTCG3'    | ----                                                                                            | ----                                                                                       |
| 18 | pMT-GFP | Nnf1a <sup>1-150</sup>                      | N terminal eGFP | Amp <sup>R</sup> | 5'GGGGACAAGTTTGTACAAA<br>AAAGCAGGCTTAGAGGATTC<br>GGAAGCCGCATTTAAA3'   | 5'GGGGACCACTTTGTACAAGAA<br>AGCTGGGTATCAATTGCTCTTGG<br>CCATAGCAATCT3'   | ----                                                                                            | ----                                                                                       |
| 19 | pMT-GFP | Nnf1a <sup>L142D</sup>                      | N terminal eGFP | Amp <sup>R</sup> | 5'GGGGACAAGTTTGTACAAA<br>AAAGCAGGCTTAAATGGAGGA<br>TTCGGAAGCCGCATTTA3' | 5'GGGGACCACTTTGTACAAGAA<br>AGCTGGGTATCAGAAGTCGTTCA<br>ATGCTTCGCCT3'    | 5'CAGCGTGAATTCATGGAG<br>CAGCAACTGGCCTCTCAGGCA<br>AAAGAAGATGAGATTGCTATG<br>GCCAAGAGCAAT3'        | 5'ATTGCTCTGGCCATAGCA<br>ATCTCATCTCTTTGCCTGA<br>GAGGCCAGTTGCTGCTCCAT<br>GAATTCACGCTG3'      |
| 20 | pMT-GFP | Nnf1a <sup>W41A, I44A, Y45A</sup>           | N terminal eGFP | Amp <sup>R</sup> | 5'GGGGACAAGTTTGTACAAA<br>AAAGCAGGCTTAAATGGAGGA<br>TTCGGAAGCCGCATTTA3' | 5'GGGGACCACTTTGTACAAGAA<br>AGCTGGGTATCAGAAGTCGTTCA<br>ATGCTTCGCCT3'    | 5'GCTCGCAGATCTGCAAGC<br>GGCGGATGCCGCTGCCAGGA<br>GCACGAGCAATCCGCTCTGG3'                          | 5'CCAGAGCGGATTGCTCGT<br>GCTCCTGGGCGAGCGGCATCC<br>GCCGCTGCAGATCTGCACA<br>GC3'               |
| 21 | pMT-GFP | Mis12                                       | N terminal eGFP | Amp <sup>R</sup> | 5'GGGGACAAGTTTGTACAAA<br>AAAGCAGGCTTAAATGGACTT<br>CAATAGCCTAGCCTACG3' | 5'GGGGACCACTTTGTACAAGAA<br>AGCTGGGTATTAAATCAGTCTCCTT<br>CTTTATCTGC3'   | ----                                                                                            | ----                                                                                       |
| 22 | pMT-GFP | Mis12 <sup>103-181</sup>                    | N terminal eGFP | Amp <sup>R</sup> | 5'GGGGACAAGTTTGTACAAA<br>AAAGCAGGCTTAGAAGAGGA<br>GGAGCAGAAGACAGCCA3'  | 5'GGGGACCACTTTGTACAAGAA<br>AGCTGGGTATTAAATCAGTCTCCTT<br>CTTTATCTGC3'   | ----                                                                                            | ----                                                                                       |
| 23 | pMT-GFP | Mis12 <sup>1-132</sup>                      | N terminal eGFP | Amp <sup>R</sup> | 5'GGGGACAAGTTTGTACAAA<br>AAAGCAGGCTTAGACTTCAAT<br>AGCCTAGCCTACGATC3'  | 5'GGGGACCACTTTGTACAAGAA<br>AGCTGGGTATTACTCGATCTTCA<br>AATGCGCCAGC3'    | ----                                                                                            | ----                                                                                       |
| 24 | pMT-GFP | Mis12 <sup>1-89</sup>                       | N terminal eGFP | Amp <sup>R</sup> | 5'GGGGACAAGTTTGTACAAA<br>AAAGCAGGCTTAAATGGACTT<br>CAATAGCCTAGCCTACG3' | 5'GGGGACCACTTTGTACAAGAA<br>AGCTGGGTACAGCACATGCGGT<br>GGAACGTGGAAC3'    | ----                                                                                            | ----                                                                                       |
| 25 | pMT-GFP | Mis12 <sup>90-181</sup>                     | N terminal eGFP | Amp <sup>R</sup> | 5'GGGGACAAGTTTGTACAAA<br>AAAGCAGGCTTACATCCGGA<br>GCACATGTTCTCGAGA3'   | 5'GGGGACCACTTTGTACAAGAA<br>AGCTGGGTATTAAATCAGTCTCCTT<br>CTTTATCTGC3'   | ----                                                                                            | ----                                                                                       |
| 26 | pMT-GFP | Mis12 <sup>L112D, L115D, L126D, L129D</sup> | N terminal eGFP | Amp <sup>R</sup> | 5'GGGGACAAGTTTGTACAAA<br>AAAGCAGGCTTAAATGGACTT<br>CAATAGCCTAGCCTACG3' | 5'GGGGACCACTTTGTACAAGAA<br>AGCTGGGTATTAAATCAGTCTCCTT<br>CTTTATCTGC3'   | L112D, L115D:<br>5'AGAGGAGGAGCAGAAGACA<br>GCCAGGGACGAGGAGGACAA<br>GGCCAAATACAGAGAGAACAT<br>GG3' | L112D, L115D:<br>5'CCATGTTCTCTGTATTT<br>GGCCTGTCTCCTCTGTCCT<br>GGCTGTCTTCTGCTCCTCTC<br>T3' |

|    |         |                                         |                 |                  |                                                                      |                                                                     |                                                                                |                                                                                  |  |                                                                                                 |                                                                                              |
|----|---------|-----------------------------------------|-----------------|------------------|----------------------------------------------------------------------|---------------------------------------------------------------------|--------------------------------------------------------------------------------|----------------------------------------------------------------------------------|--|-------------------------------------------------------------------------------------------------|----------------------------------------------------------------------------------------------|
|    |         |                                         |                 |                  |                                                                      |                                                                     |                                                                                |                                                                                  |  | L126D, L129D:<br>5'CAAATACAGAGAGAACATG<br>GCCATGGACGCGCATGACAAG<br>ATCGAGGAGGAGAAGTACGC<br>CG3' | L126D, L129D:<br>5'CGGCGTACTTCTCCTCCTC<br>GATCTTGTATGCGCGTCCA<br>TGGCCATGTTCTCTGTATT<br>TG3' |
| 27 | pMT-GFP | Mis12 <sup>L126D, L129D</sup>           | N terminal eGFP | Amp <sup>R</sup> | 5'GGGGACAAGTTTGTACAAA<br>AAAGCAGGCTTAATGGACTT<br>CAATAGCCTAGCCTACG3' | 5'GGGGACCACTTTGTACAAGAA<br>AGCTGGGTATTAATCAGTCTCCTT<br>CTTTATCTGC3' | 5'CAAATACAGAGAGAACATG<br>GCCATGGACGCGCATGACAAG<br>ATCGAGGAGGAGAAGTACGC<br>CG3' | 5'CGGCGTACTTCTCCTCCTC<br>GATCTTGTATGCGCGTCCA<br>TGGCCATGTTCTCTGTATT<br>TG3'      |  |                                                                                                 |                                                                                              |
| 28 | pMT-GFP | Mis12 <sup>L112D, L115D</sup>           | N terminal eGFP | Amp <sup>R</sup> | 5'GGGGACAAGTTTGTACAAA<br>AAAGCAGGCTTAATGGACTT<br>CAATAGCCTAGCCTACG3' | 5'GGGGACCACTTTGTACAAGAA<br>AGCTGGGTATTAATCAGTCTCCTT<br>CTTTATCTGC3' | 5'AGAGGAGGAGCAGAAGACA<br>GCCAGGACGAGGAGGACAA<br>GGCCAAATACAGAGAGAACAT<br>GG3'  | 5'CCATGTTCTCTGTATT<br>GGCCTTGTCTCCTCGTCCCT<br>GGCTGTCTTCTCCTCCTC<br>T3'          |  |                                                                                                 |                                                                                              |
| 29 | pMT-GFP | Mis12 <sup>F12A, F13A, F15A, T16A</sup> | N terminal eGFP | Amp <sup>R</sup> | 5'GGGGACAAGTTTGTACAAA<br>AAAGCAGGCTTAATGGACTT<br>CAATAGCCTAGCCTACG3' | 5'GGGGACCACTTTGTACAAGAA<br>AGCTGGGTATTAATCAGTCTCCTT<br>CTTTATCTGC3' | 5'CAATAGCTAGCCTACGATC<br>AGAAGGCCCAATGCCGCCG<br>CGGCACAGTTGTCTGCAGAGC<br>GCG3' | 5'CGGCTCTGCAGACAACT<br>GTGCCGCGCGGCAATTGGC<br>GGCCTTCTGATCGTAGGCTA<br>GGCTATTG3' |  |                                                                                                 |                                                                                              |

### Duet Vectors

| # | Vector | MCSI  |                             |            | MCSII |                             | Selectable marker<br>(for propagation<br>in <i>E.coli</i> ) | Forward primer<br>MCSI<br>(used for cloning) | Reverse primer<br>MCSI<br>(used for cloning) | Forward primer<br>MCSII<br>(used for cloning) | Reverse primer<br>MCSII<br>(used for cloning)          | Mutagenesis<br>primer -<br>forward | Mutagenesis<br>primer -<br>reverse |
|---|--------|-------|-----------------------------|------------|-------|-----------------------------|-------------------------------------------------------------|----------------------------------------------|----------------------------------------------|-----------------------------------------------|--------------------------------------------------------|------------------------------------|------------------------------------|
|   |        | cDNA  | Enzymes used<br>for cloning | His<br>tag | cDNA  | Enzymes used<br>for cloning |                                                             |                                              |                                              |                                               |                                                        |                                    |                                    |
| 1 | pET    | Mis12 | BamH1, Asc1                 | +          | ----  | ----                        | Amp <sup>R</sup>                                            | 5'CAGGATCCTATG<br>GACTTCAATAGCCT<br>A3'      | 5'TGGCGGCCCTA<br>TTAATCAGTCTCCT<br>TCTT3'    | ----                                          | ----                                                   | ----                               | ----                               |
| 2 | pET    | Nsl1  | EcoR1, Asc1                 | +          | ----  | ----                        | Amp <sup>R</sup>                                            | 5'CGAATTCGATGG<br>AGCCAGCCGAAAG<br>T3'       | 5'TGGCGGCCTTA<br>TCACCGTTGGTTGG<br>CCAT3'    | ----                                          | ----                                                   | ----                               | ----                               |
| 3 | pET    | Mis12 | BamH1, Asc1                 | +          | Nsl1  | Bgl2, Kpn1                  | Amp <sup>R</sup>                                            | 5'CAGGATCCTATG<br>GACTTCAATAGCCT<br>A3'      | 5'TGGCGGCCCTA<br>TTAATCAGTCTCCT<br>TCTT3'    | 5'GAAGATCTCATG<br>GAGCCAGCCGAAA<br>GT3'       | 5'GTGGTACCTTAT<br>CACCGTTGGTTGG<br>CCAT3'              | ----                               | ----                               |
| 4 | pET    | ----  | ----                        | -          | Nsl1  | Bgl2, Kpn1                  | Amp <sup>R</sup>                                            | ----                                         | ----                                         | 5'GAAGATCTCATG<br>GAGCCAGCCGAAA<br>GT3'       | 5'GTGGTACCTTAT<br>CACCGTTGGTTGG<br>CCAT3'              | ----                               | ----                               |
| 5 | pCOLA  | Nnf1a | BamH1, Asc1                 | +          | ----  | ----                        | Kan <sup>R</sup>                                            | 5'CGGGATCCTATG<br>GAGGATTCGGAAG<br>CC3'      | 5'AGGCGCGCCTCA<br>GAAGTCGTTCAAT<br>GC3'      | ----                                          | ----                                                   | ----                               | ----                               |
| 6 | pCOLA  | Nnf1a | BamH1, Asc1                 | +          | Mis12 | Nde1, Asis1                 | Kan <sup>R</sup>                                            | 5'CGGGATCCTATG<br>GAGGATTCGGAAG<br>CC3'      | 5'AGGCGCGCCTCA<br>GAAGTCGTTCAAT<br>GC3'      | 5'GTGACACATATG<br>ATGGACTTCAATAG<br>CCTA3'    | 5'ATACGCGCGAT<br>CGCTCATTAAATCA<br>GTCTCTTCTTTAT<br>3' | ----                               | ----                               |
| 7 | pCOLA  | Nnf1a | Nco1, BamH1                 | -          | Mis12 | Nde1, Asis1                 | Kan <sup>R</sup>                                            | 5'CCTTCCATGGTT<br>ATGGAGGATTCGG<br>AAGCC3'   | 5'CGGGATCCTTAT<br>CAGAAGTCGTTCA<br>ATGC3'    | 5'GTGACACATATG<br>ATGGACTTCAATAG<br>CCTA3'    | 5'ATACGCGCGAT<br>CGCTCATTAAATCA                        | ----                               | ----                               |

|    |       |                                       |             |   |                                         |             |                  |                                                          |                                                                 |                                                         |                                                        |                                                                                        |                                                                                          |      |
|----|-------|---------------------------------------|-------------|---|-----------------------------------------|-------------|------------------|----------------------------------------------------------|-----------------------------------------------------------------|---------------------------------------------------------|--------------------------------------------------------|----------------------------------------------------------------------------------------|------------------------------------------------------------------------------------------|------|
|    |       |                                       |             |   |                                         |             |                  |                                                          |                                                                 |                                                         |                                                        | GTCTCTTCTTTAT<br>3'                                                                    |                                                                                          |      |
| 8  | pACYC | CenpC <sup>1-94</sup>                 | BamH1, Asc1 | + | ----                                    | ----        | Cm <sup>R</sup>  | 5'GTGACAGGATCC<br>TTCGAAGCCCCAG<br>AACAAACGAC3'          | 5'ATACGCGGCGCG<br>CCTCATTAGACTTT<br>CTCGGTGGCGGCA<br>CTGTTTTT3' | ----                                                    | ----                                                   | ----                                                                                   | ----                                                                                     | ---- |
| 9  | pACYC | CenpC <sup>1-94</sup>                 | Nco1, Asc1  | - | ----                                    | ----        | Cm <sup>R</sup>  | 5'GTGACACCATGG<br>GCATGTCGAAGCC<br>CCAGAACAAC3'          | 5'ATACGCGGCGCG<br>CCTCATTAGACTTT<br>CTCGGTGGCGGCA<br>CTGTTTTT3' | ----                                                    | ----                                                   | ----                                                                                   | ----                                                                                     | ---- |
| 10 | pACYC | CenpC <sup>1-94 F26A,F29A</sup>       | BamH1, Asc1 | + | ----                                    | ----        | Cm <sup>R</sup>  | 5'GTGACAGGATCC<br>TTCGAAGCCCCAG<br>AACAAACGAC3'          | 5'ATACGCGGCGCG<br>CCTCATTAGACTTT<br>CTCGGTGGCGGCA<br>CTGTTTTT3' | ----                                                    | ----                                                   | 5'CCAGCCAGTGA<br>AGGACAAGGAGC<br>GCGCCCGCGCG<br>CCATGATGCGCA<br>AGCTTGCCGAAA<br>ATA3'  | 5'TATTTTCGGCAA<br>GCTTGCGCATCAT<br>GGCGGCGGCGGC<br>GCGCTCCTTGTC<br>TTCACTGGCTGG3<br>,    |      |
| 11 | pCOLA | Nnf1a                                 | BamH1, Asc1 | + | Mis12 <sup>F12A, F13A, F15A, T16A</sup> | Nde1, Asis1 | Kan <sup>R</sup> | 5'CGGGATCCTATG<br>GAGGATTCGGAAG<br>CC3'                  | 5'AGGCGCGCCTCA<br>GAAGTCGTTCAAT<br>GC3'                         | 5'GTGACACATATG<br>ATGGACTTCAATAG<br>CCTA3'              | 5'ATACGCGCGAT<br>CGCTCATTAAATCA<br>GTCTCTTCTTTAT<br>3' | 5'CAATAGCCTAG<br>CCTACGATCAGAA<br>GGCCGCAATGC<br>CGCCGCGGCA<br>GTTGTCTGCAGA<br>GCGCG3' | 5'CGCGCTCTGCA<br>GACAACGTGCC<br>GCGGCGGCGATTG<br>GCGGCTTCTGAT<br>CGTAGGATAGGC<br>TATTG3' |      |
| 12 | pCOLA | Nnf1a <sup>W41A, I44A,<br/>Y45A</sup> | BamH1, Asc1 | + | Mis12                                   | Nde1, Asis1 | Kan <sup>R</sup> | 5'CGGGATCCTATG<br>GAGGATTCGGAAG<br>CC3'                  | 5'AGGCGCGCCTCA<br>GAAGTCGTTCAAT<br>GC3'                         | 5'GTGACACATATG<br>ATGGACTTCAATAG<br>CCTA3'              | 5'ATACGCGCGAT<br>CGCTCATTAAATCA<br>GTCTCTTCTTTAT<br>3' | 5'GCTGCGCAGAT<br>CTGCAAGCGGCG<br>GATGCCGCTGCC<br>AGGAGCACGAGC<br>AATCCGCTCTGG3<br>,    | 5'CCAGAGCGGAT<br>TGCTCGTCTCT<br>GGGACGCGGCAT<br>CCGCCGCTTGCA<br>ATGCGCAGC3'              |      |
| 13 | pCOLA | Nnf1a <sup>122-196</sup>              | BamH1, Asc1 | + | Mis12                                   | Nde1, Asis1 | Kan <sup>R</sup> | 5'GTGACAGGATCC<br>TCGCATGCGATTTT<br>TGGACTTCAGCGT<br>G3' | 5'ATACGCGGCGCG<br>CCTCATTAGAAGTC<br>GTTCAATGCTTCGC<br>CTAGT3'   | 5'GTGACACATATG<br>ATGGACTTCAATAG<br>CCTA3'              | 5'ATACGCGCGAT<br>CGCTCATTAAATCA<br>GTCTCTTCTTTAT<br>3' | ----                                                                                   | ----                                                                                     |      |
| 14 | pCOLA | Nnf1a <sup>122-196</sup>              | BamH1, Asc1 | + | Mis12 <sup>104-181</sup>                | Nde1, Asis1 | Kan <sup>R</sup> | 5'GTGACAGGATCC<br>TCGCATGCGATTTT<br>TGGACTTCAGCGT<br>G3' | 5'ATACGCGGCGCG<br>CCTCATTAGAAGTC<br>GTTCAATGCTTCGC<br>CTAGT3'   | 5'GTGACACATATG<br>ATGGAAGAGGAGG<br>AGCAGAAGACAGC<br>C3' | 5'ATACGCGCGAT<br>CGCTCATTAAATCA<br>GTCTCTTCTTTAT<br>3' | ----                                                                                   | ----                                                                                     |      |
| 15 | pCOLA | Nnf1a                                 | BamH1, Asc1 | + | Mis12 <sup>104-181</sup>                | Nde1, Asis1 | Kan <sup>R</sup> | 5'CGGGATCCTATG<br>GAGGATTCGGAAG<br>CC3'                  | 5'AGGCGCGCCTCA<br>GAAGTCGTTCAAT<br>GC3'                         | 5'GTGACACATATG<br>ATGGAAGAGGAGG<br>AGCAGAAGACAGC<br>C3' | 5'ATACGCGCGAT<br>CGCTCATTAAATCA<br>GTCTCTTCTTTAT<br>3' | ----                                                                                   | ----                                                                                     |      |

### Supplementary Table S3.

List of vectors used in this study with sequences of primers used for cloning and mutagenesis.

### **Supplementary References**

51. Mason JM, Arndt KM 2004 Coiled coil domains: stability, specificity, and biological implications. *Chembiochem* 5: 170–6. doi:10.1002/cbic.200300781

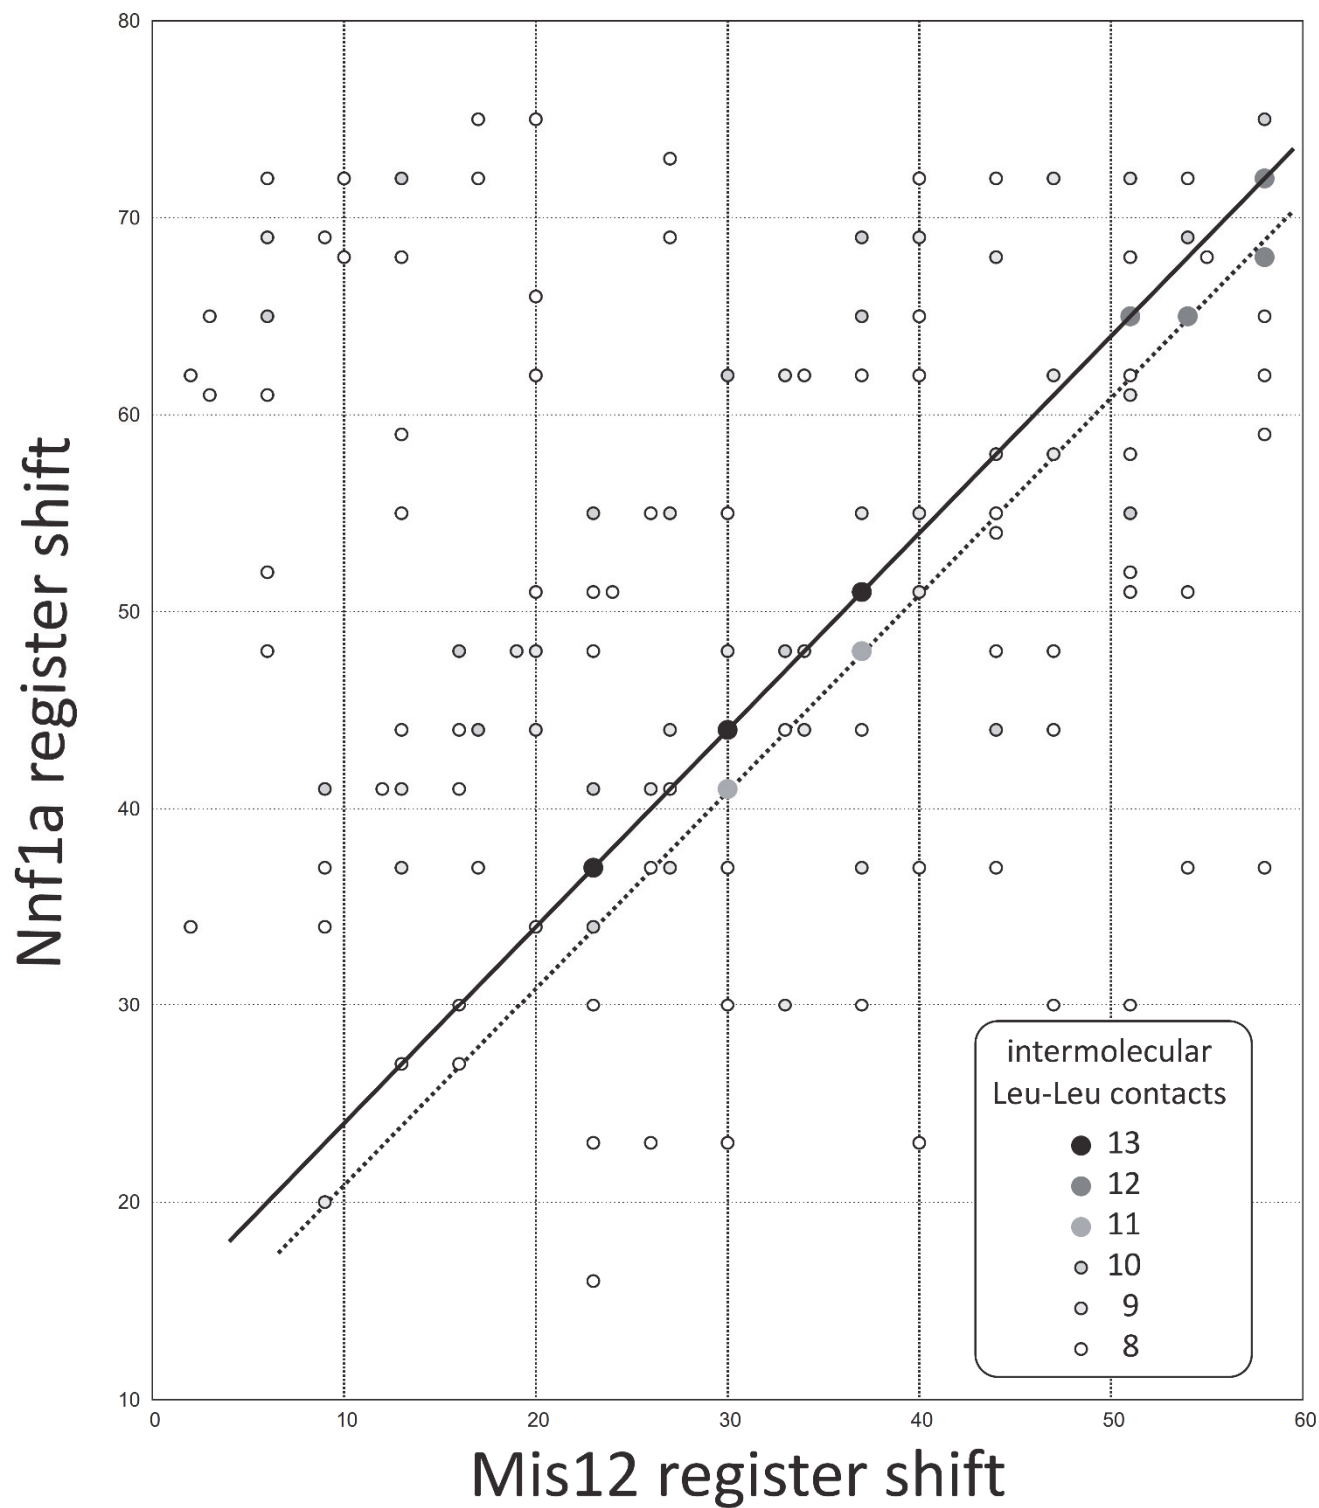

Supplementary Figure S1

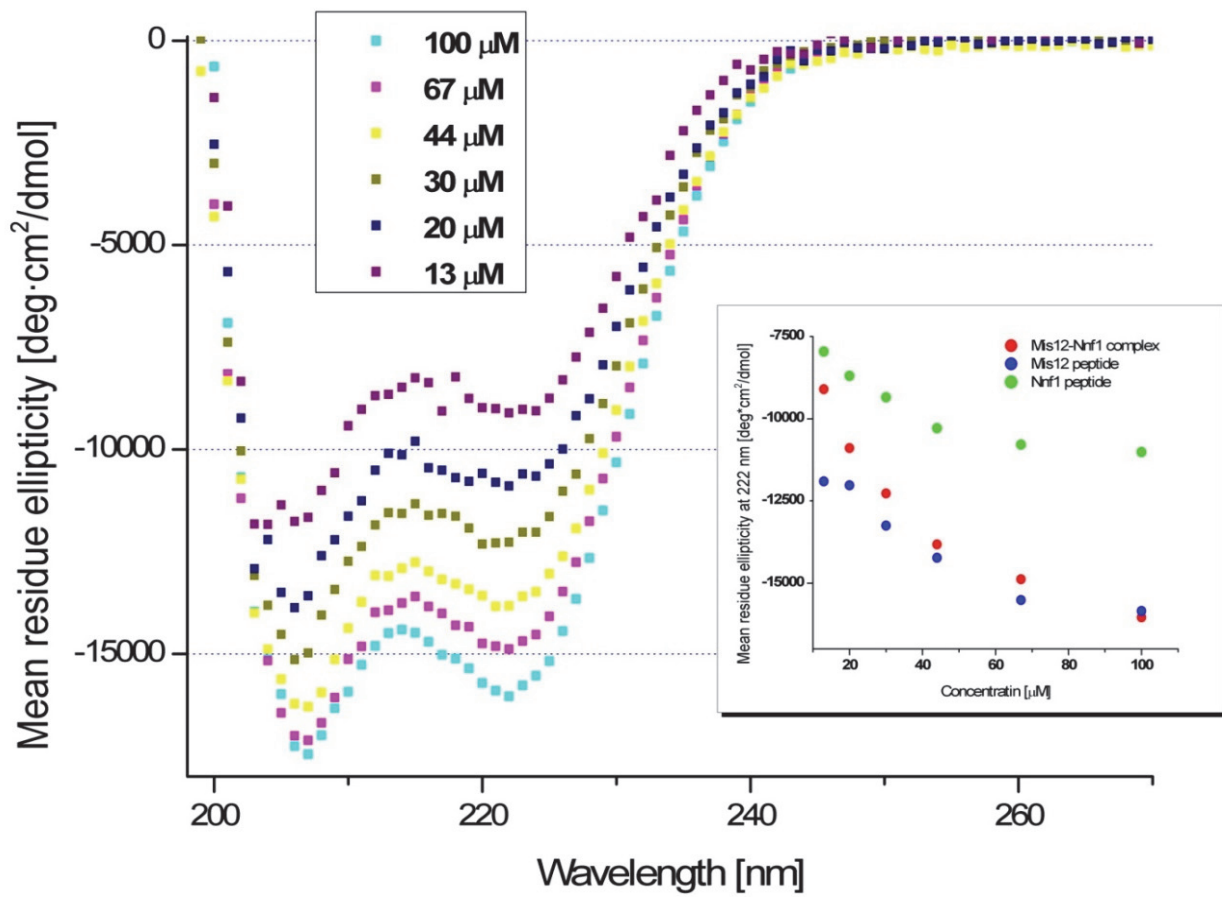

**Supplementary Figure S2**

# Mis12

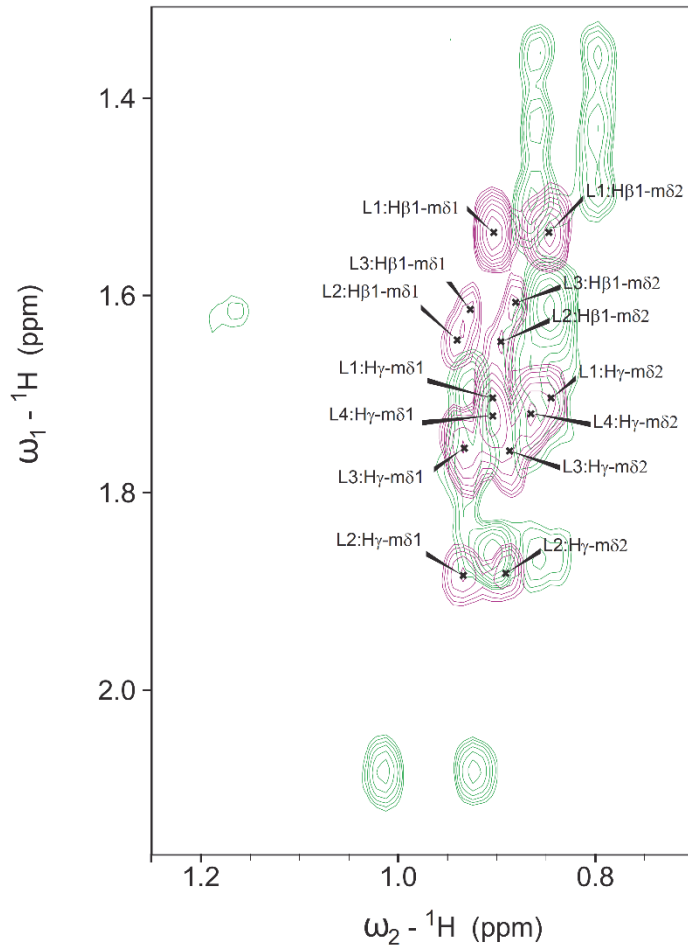

# Nnf1a

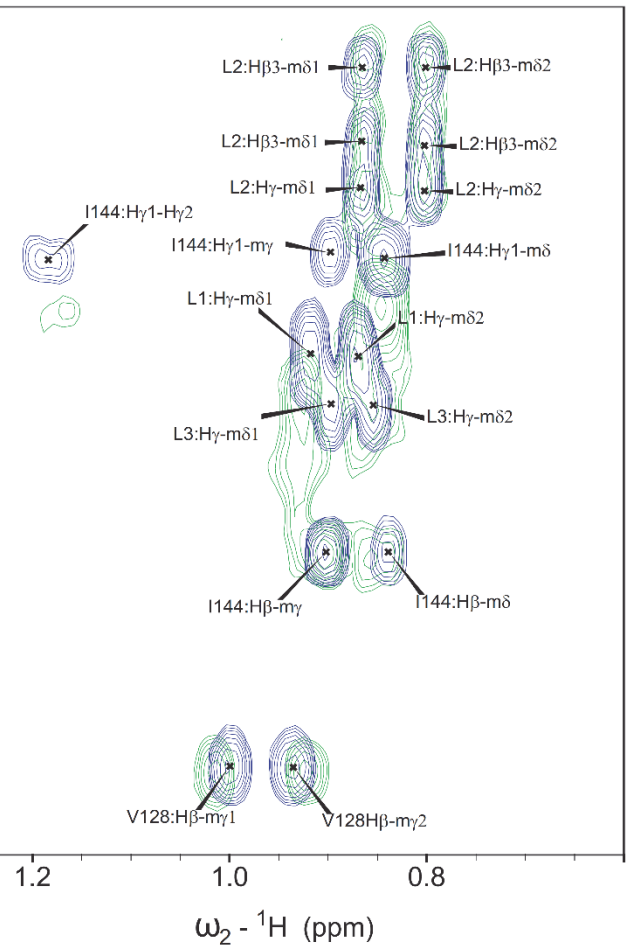



A

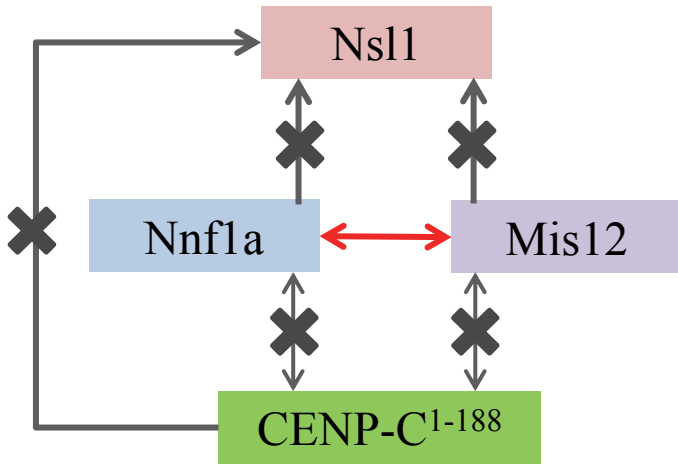

B

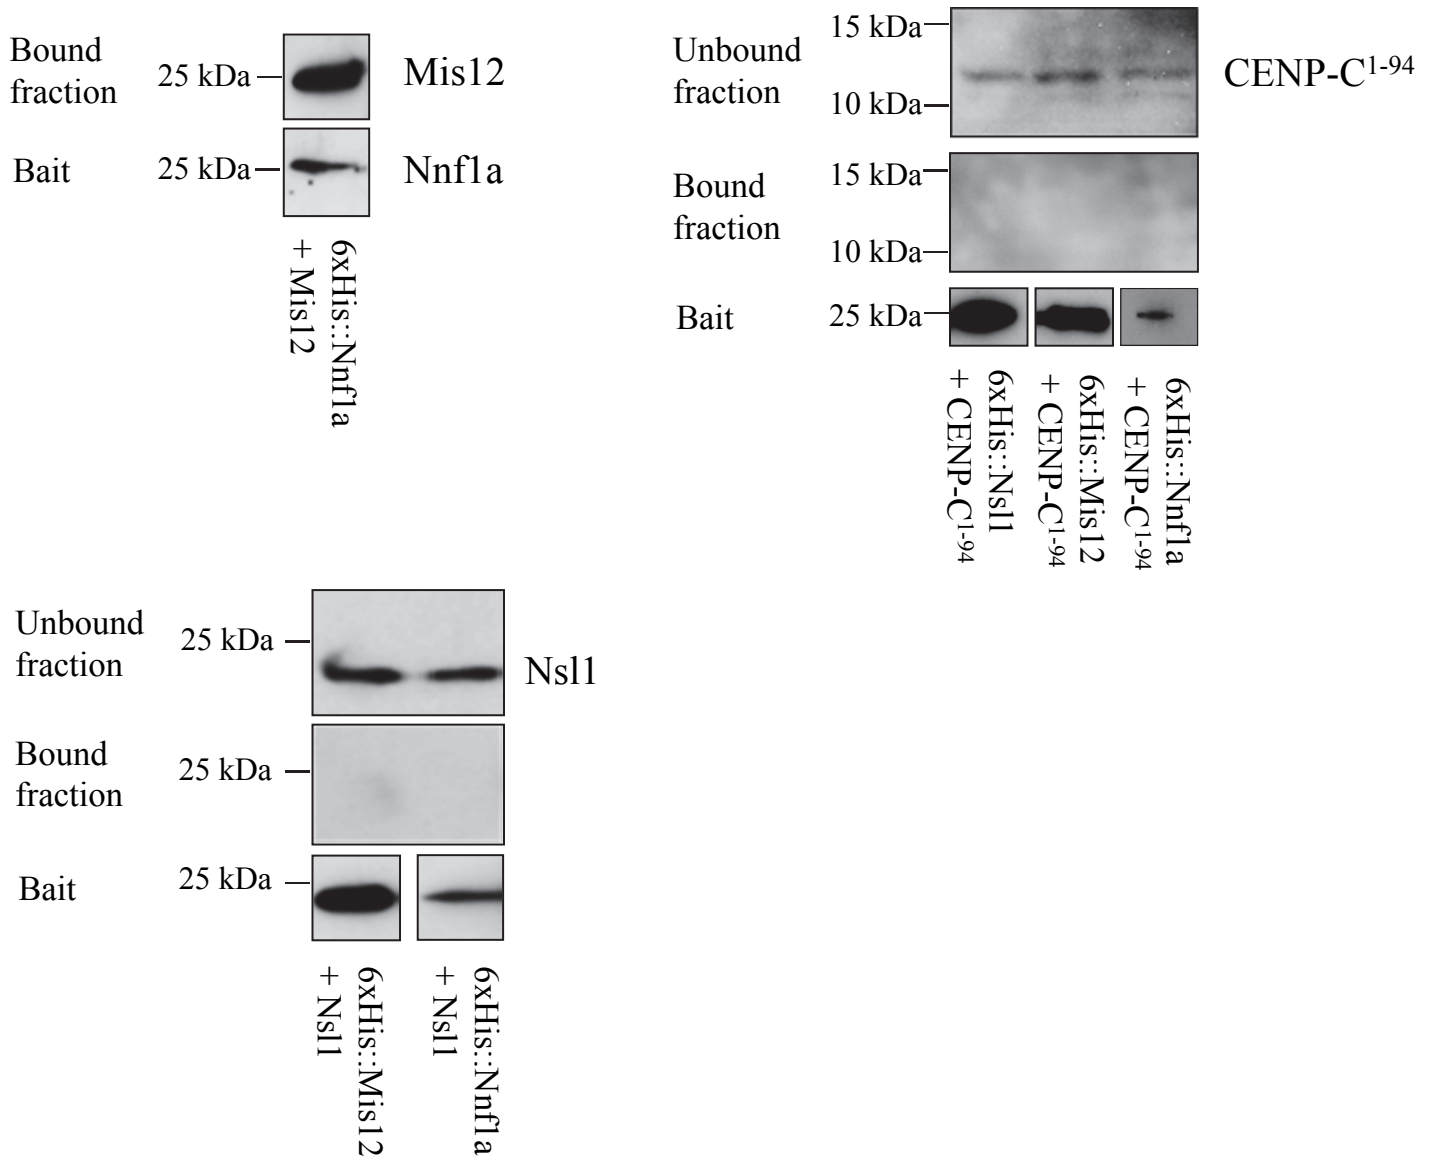

Supplementary Figure S4

A

## 6xHis::Nnf1a+Mis12

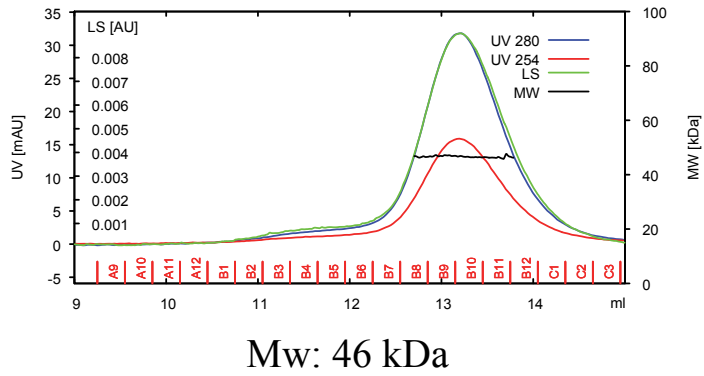

B

6xHis::CENP-C<sup>1-94</sup>+Nnf1a+Mis12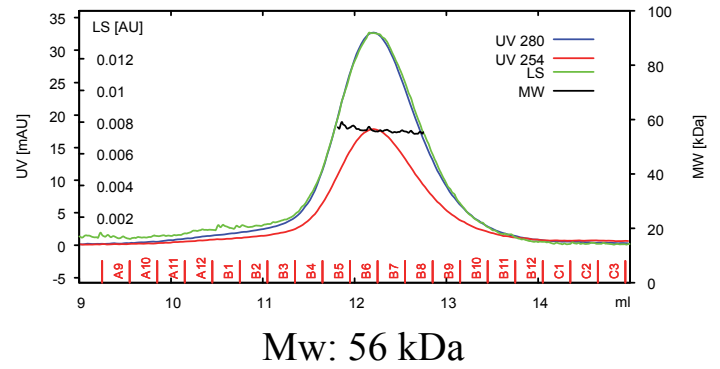

C

6xHis::Nnf1a+Mis12+CENP-C<sup>1-94</sup>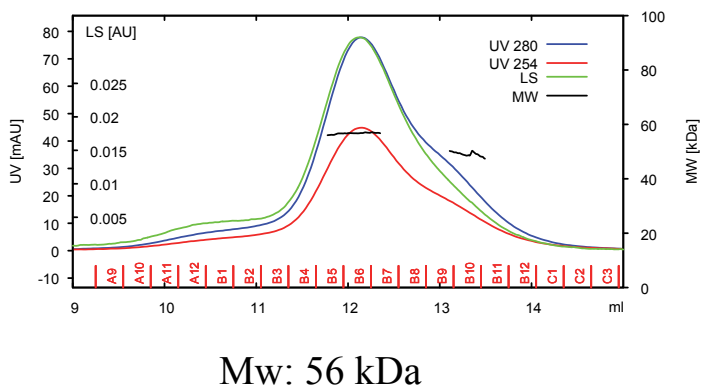

D

## 6xHis::Nsl1+Nnf1a+Mis12

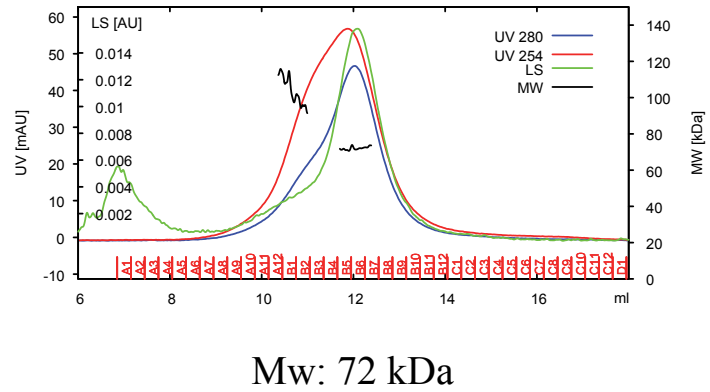

A

## 6xHis::Nnf1a+Mis12

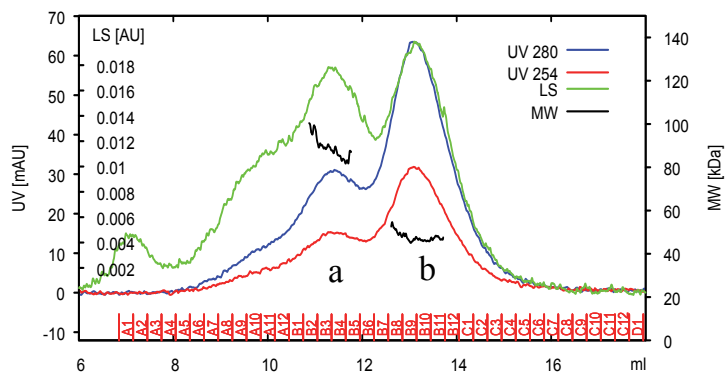

a) Mw: 88 kDa

a) Mw: 47 kDa

B

6xHis::CENP-C<sup>1-94</sup>+Nnf1a+Mis12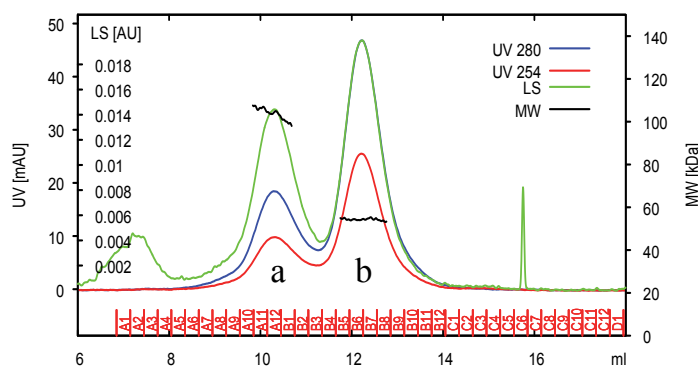

a) Mw: 103 kDa

a) Mw: 54 kDa

C

6xHis::Nnf1a+Mis12+CENP-C<sup>1-94</sup>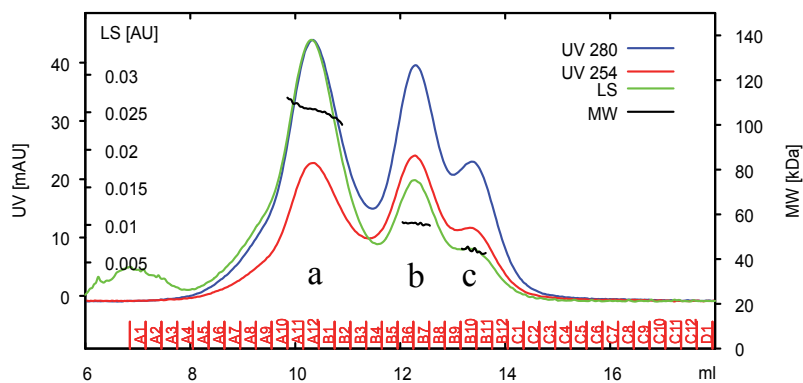

a) Mw: 106 kDa

b) Mw: 56 kDa

c) Mw: 44 kDa

D

| Complex                                        | Theoretical mass of monomeric complex (kDa) | Theoretical mass of dimeric complex (kDa) | Mass calculated by MALS (kDa) |
|------------------------------------------------|---------------------------------------------|-------------------------------------------|-------------------------------|
| 6xHis::Nnf1a+Mis12                             | 45.378                                      | 90.75                                     | 88.79                         |
| 6xHis::Nnf1a+Mis12 + CENP-C <sup>1-94</sup>    | 56.367                                      | 112.73                                    | 106.6                         |
| 6xHis:: CENP-C <sup>1-94</sup> + Nnf1a + Mis12 | 56.525                                      | 113.05                                    | 103.7                         |

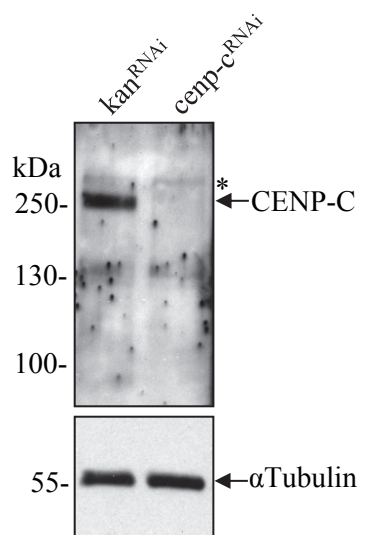

**Supplementary Figure S7**
